# Supplementary material
Source: PubMed Central journal article supplement (PMC1360524)
Supplement: pnas_0506476103_5.pdf [file pnas_0506476103_5.pdf]

**Table 2. Dimensionless groups of the model and their reference values**

| <b>Parameter</b> | <b>Description</b>                                                                                                                                           | <b>Reference value</b> |
|------------------|--------------------------------------------------------------------------------------------------------------------------------------------------------------|------------------------|
| $\chi$           | $\frac{\text{time scale of constitutive deactivation of MPK-1}^*}{\text{time scale of lateral signal-mediated deactivation of MPK-1}^*}$                     | 1                      |
| $\psi$           | $\frac{\text{time scale of MPK-1}^*\text{-mediated downregulation of lateral signal}}{\text{time scale of constitutive deactivation of MPK-1}^*}$            | $2.8 \times 10^1$      |
| $\mu$            | $\frac{\text{time scale of constitutive deactivation of MPK-1}^*}{\text{time scale of induced activation of MPK-1}^*}$                                       | $2 \times 10^1$        |
| $\lambda_d$      | $\frac{\text{time scale of constitutive deactivation of MPK-1}^*}{\text{time scale of constitutive downregulation of lateral signal}}$                       | $2.4 \times 10^{-2}$   |
| $\lambda_s$      | $\frac{\text{time scale of constitutive deactivation of MPK-1}^*}{\text{time scale of constitutive synthesis of a characteristic amount of lateral signal}}$ | $3.9 \times 10^{-4}$   |
| $\kappa_M$       | dimensionless threshold for activation of lateral signal by MPK-1*                                                                                           | $2.5 \times 10^{-1}$   |
| $\kappa_L$       | dimensionless threshold for MPK-1* inhibition by lateral signal                                                                                              | $2.5 \times 10^{-1}$   |
