# Supplementary material
Source: PubMed Central journal article supplement (PMC1360524)

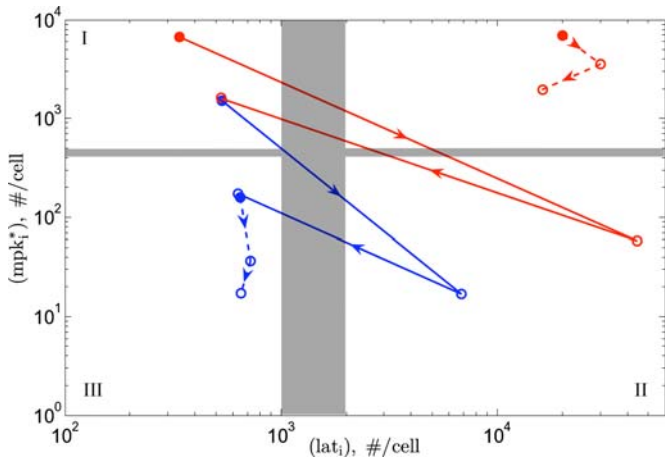

Supplement: pnas_0506476103_1.pdf [file pnas_0506476103_1.pdf]

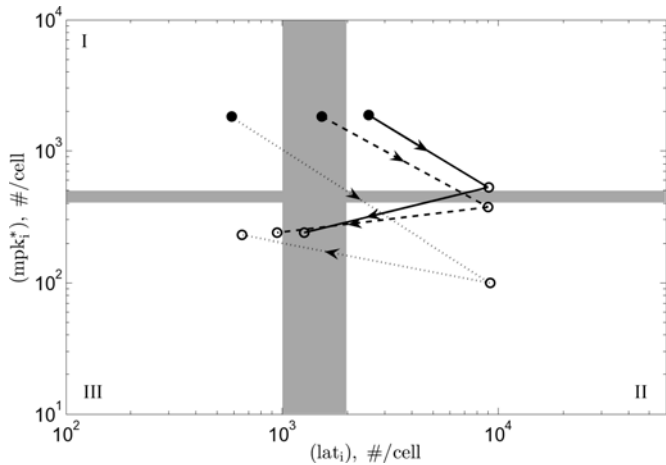

Supplement: pnas_0506476103_2.pdf [file pnas_0506476103_2.pdf]
